# Supplementary material for: E-cadherin Downregulation and microRNAs in Sporadic Intestinal-Type Gastric Cancer
Source: PubMed Central journal article supplement (PMC6769612; doi:10.3390/ijms20184452), 2019-09-10
Supplement: ijms-20-04452-s001.pdf [file ijms-20-04452-s001.pdf]

## Supplementary materials

### Selection of *CDH1*-regulating miRNAs in gastric cancer

An *in-silico* analysis was executed to determine miRNAs that can potentially target the 3'UTR of *CDH1* and its regulators *SNAI1*, *SNAI2*, *TWIST1*, *ZEB1*, *ZEB2*, *EZH2* and *SUZ12*. To that purpose, the following three databases and predictive bioinformatics tools were utilized:

1. miRTarBase v6.0 (<http://miRTarBase.mbc.nctu.edu.tw/>), which is the most comprehensively annotated online database reporting experimentally validated microRNA-target interactions (MTIs). The database has thus far accumulated 4,966 articles, 7,439 strongly validated MTIs (through reporter assays or western blots) and 348,007 MTIs from crosslinking and immunoprecipitation sequencing [1]. In addition to that, in version 6 of the database you can query miR-target in disease and get as a result a list of experimentally tested miRNAs and their targets that have been reported in that specific disease.
2. TargetScan v7.1 (<http://www.targetscan.org/>) that is an online site in which biological targets of miRNAs are predicted based on the presence of conserved 8mer, 7mer and 6mer sites matching the seed region of each miRNA [2]. It provides accurate rankings of the predicted targets for miRNAs based on either the probability of evolutionarily conserved targeting ( $P_{CT}$  scores) [3] or the predicted efficacy of targeting (context+++ scores) [4]. TargetScanHuman is based on matches to human 3' UTRs and their orthologs, as indicated by UCSC (University of California, Santa Cruz) whole-genome alignments.
3. miRDB v5 (<http://mirdb.org/miRDB/>), which is an online database for miRNA target prediction and functional annotations. Predictions on MTIs can be queried by miRNA names or by gene-target information. The targets reported in this database have been derived from the bioinformatics tool MirTarget v3. This tool was developed upon the analysis of thousands of MTIs from high-throughput sequencing experiments, which allowed the identification of common features associated with miRNA target binding. These features were then acquired by machine learning methods to predict miRNA targets [5,6].

This extensive analysis was combined with a search of the literature regarding miRNAs' expression in gastric cancer to guide the selection of a list of miRNAs to be differentially quantified in paired normal and tumor tissue of the IGC patients.

**Table S1:** List of the miRs selected from literature on the basis of their involvement in direct or indirect E-cadherin repression.

| miRbase Id      | Assay ID/Name | Mature miR sequence                                                                                               |
|-----------------|---------------|-------------------------------------------------------------------------------------------------------------------|
| hsa-miR-506     | 001050        | UAAGGCACCCUUCUGAGUAGA                                                                                             |
| hsa-miR-141-3p  | 000463        | UAACACUGUCUGGUAAAAGAUGG                                                                                           |
| hsa-miR-217     | 002337        | UACUGCAUCAGGAACUGAUUGGA                                                                                           |
| hsa-miR-429     | 001024        | UAAUACUGUCUGGUAAAACCGU                                                                                            |
| hsa-miR-199a-5p | 000498        | CCCAGUGUUCAGACUACCUGUUC                                                                                           |
| hsa-miR-200a-3p | 000502        | UAACACUGUCUGGUAAACGAUGU                                                                                           |
| hsa-miR-200b-3p | 002251        | UAAUACUGCCUGGUAAUGAUGA                                                                                            |
| hsa-miR-200c-3p | 002300        | UAAUACUGCCGGGUAAUGAUGGA                                                                                           |
| hsa-miR-101-3p  | 002253        | UACAGUACUGUGAUAAACUGAA                                                                                            |
| hsa-miR-153-3p  | 001191        | UUGCAUAGUCACAAAAGUGAUC                                                                                            |
| hsa-miR-26b-5p  | 000407        | UUCAAGUAAUUCAGGAUAGGU                                                                                             |
| hsa-miR-23a-3p  | 000399        | AUCACAUUGCCAGGGAUUUC                                                                                              |
| hsa-miR-544a    | 002265        | AUUCUGCAUUUUUAGCAAGUUC                                                                                            |
| hsa-miR-34c-5p  | 000428        | AGGCAGUGUAGUUAGCUGAUUGC                                                                                           |
| U6 snRNA        | 001973        | GTGCTCGCTTCGGCAGCACATATACTAAAATTGGAACGA<br>TACAGAGAAGATTAGCATGGCCCCTGCGCAAGGATGACA<br>CGCAAATTCGTGAAGCGTTCCATATTT |

**Table S2.** Expression levels of target mRNA and miR in the case series of 33 patients. The cases are ordered based on *CDH1* FC (Fold Change). N=Normal; T=Tumor.

| Patient ID | FC <i>CDH1</i> | 2- $\Delta$ CT <i>CDH1</i> | FC <i>EZH2</i> | 2- $\Delta$ CT <i>EZH2</i> | FC miR-101 | 2- $\Delta$ CT miR-101 | FC miR-26b | 2- $\Delta$ CT miR-26b | FC miR-200c | 2- $\Delta$ CT miR-200c |
|------------|----------------|----------------------------|----------------|----------------------------|------------|------------------------|------------|------------------------|-------------|-------------------------|
| 05/09N     |                | 1,33793                    |                | 0,01160                    |            | 0,01105                |            | 0,17678                |             | 0,10366                 |
| 05/09T     | <b>0,0280</b>  | 0,03742                    | 0,5548         | 0,00643                    | 0,4796     | 0,00530                | 0,4323     | 0,07642                | 1,1487      | 0,11908                 |
| 16/09N     |                | 0,06250                    |                | 0,00247                    |            | 0,01184                |            | 0,69255                |             | 0,46009                 |
| 16/09K     | <b>0,0306</b>  | 0,00191                    | 0,2415         | 0,00060                    | 0,1743     | 0,00206                | 0,2736     | 0,18946                | 0,8888      | 0,40895                 |
| 18/11N     |                | 2,29740                    |                | 0,01978                    |            | 0,02256                |            | 0,14865                |             | 0,26794                 |
| 18/11T     | <b>0,0421</b>  | 0,09672                    | 0,2932         | 0,00580                    | 0,3686     | 0,00832                | 0,2432     | 0,03615                | 0,4204      | 0,11266                 |
| 12/08N     |                | 2,60268                    |                | 0,00744                    |            | 0,05831                |            | 0,76844                |             | 1,14076                 |
| 12/08T     | <b>0,0529</b>  | 0,13774                    | 5,6569         | 0,04210                    | 0,1756     | 0,01024                | 0,1856     | 0,14260                | 0,2624      | 0,29937                 |
| 17/11N     |                | 1,59107                    |                | 0,02664                    |            | 0,01296                |            | 0,20166                |             | 0,25000                 |
| 17/11T     | <b>0,0548</b>  | 0,08717                    | 0,3816         | 0,01017                    | 0,7738     | 0,01003                | 0,6156     | 0,12414                | 0,8645      | 0,21613                 |
| 06/07N     |                | 2,41162                    |                | 0,02836                    |            | 0,00572                |            | 0,11344                |             | 0,12674                 |
| 06/07T     | <b>0,0559</b>  | 0,13490                    | 0,1518         | 0,00430                    | 0,2872     | 0,00164                | 0,3121     | 0,03540                | 0,2398      | 0,03040                 |
| 14/09N     |                | 0,65520                    |                | 0,01541                    |            | 0,00375                |            | 0,15177                |             | 0,26794                 |
| 14/09K     | <b>0,0819</b>  | 0,05366                    | 0,6926         | 0,01067                    | 0,6113     | 0,00229                | 0,7900     | 0,11991                | 0,7220      | 0,19345                 |
| 02/14N     |                | 0,02956                    |                | 0,00024                    |            | 0,00635                |            | 0,11908                |             | 0,17556                 |
| 02/14K     | <b>0,1303</b>  | 0,00385                    | 2,4284         | 0,00059                    | 0,9931     | 0,00630                | 0,7270     | 0,08657                | 0,0934      | 0,01640                 |
| 10/16N     |                | 0,03467                    |                | 0,00021                    |            | 0,00416                |            | 0,05831                |             | 0,09151                 |
| 10/16K     | <b>0,1377</b>  | 0,00478                    | 5,0630         | 0,00105                    | 0,3078     | 0,00128                | 0,2643     | 0,01541                | 0,2500      | 0,02288                 |
| 09/15N     |                | 0,00897                    |                | 0,00032                    |            | 0,00274                |            | 0,04904                |             | 0,06792                 |
| 09/15K     | <b>0,1638</b>  | 0,00147                    | 4,2281         | 0,00135                    | 0,4796     | 0,00132                | 0,5359     | 0,02628                | 0,3686      | 0,02503                 |
| 04/12N     |                | 0,19615                    |                | 0,00416                    |            | 0,00596                |            | 0,23651                |             | 0,38422                 |
| 04/12K     | <b>0,2238</b>  | 0,04389                    | 2,2658         | 0,00942                    | 0,4796     | 0,00286                | 0,5322     | 0,12587                | 0,4033      | 0,15496                 |
| 12/12N     |                | 0,06606                    |                | 0,00242                    |            | 0,00436                |            | 0,17924                |             | 0,20027                 |
| 12/12K     | <b>0,2253</b>  | 0,01488                    | 1,3472         | 0,00326                    | 0,4033     | 0,00176                | 0,4263     | 0,07642                | 1,1251      | 0,22531                 |
| 09/07N     |                | 0,21022                    |                | 0,00375                    |            | 0,01360                |            | 0,19345                |             | 0,21022                 |
| 09/07T     | <b>0,2793</b>  | 0,05872                    | 2,3950         | 0,00897                    | 0,6029     | 0,00820                | 0,6029     | 0,11663                | 1,1728      | 0,24656                 |
| 06/09N     |                | 0,69737                    |                | 0,00340                    |            | 0,01640                |            | 0,22531                |             | 0,48633                 |
| 06/09T     | <b>0,4090</b>  | 0,28519                    | 10,3388        | 0,03516                    | 0,5035     | 0,00826                | 0,9075     | 0,20448                | 0,4033      | 0,19615                 |
| 19/17N     |                | 0,02856                    |                | 0,00115                    |            | 0,00515                |            | 0,12500                |             | 0,19078                 |
| 19/17K     | 0,5285         | 0,01509                    | 1,5052         | 0,00172                    | 1,5476     | 0,00798                | 0,7738     | 0,09672                | 0,4033      | 0,07695                 |
| 15/16N     |                | 0,02896                    |                | 0,00084                    |            | 0,01053                |            | 0,15177                |             | 0,23326                 |
| 15/16K     | 0,6329         | 0,01833                    | 1,5692         | 0,00132                    | 0,2553     | 0,00269                | 0,2349     | 0,03565                | 0,2624      | 0,06121                 |
| 03/15N     |                | 0,00814                    |                | 0,00052                    |            | 0,00770                |            | 0,14559                |             | 0,30355                 |
| 03/15K     | 0,7792         | 0,00635                    | 5,4264         | 0,00282                    | 0,2813     | 0,00217                | 0,4090     | 0,05954                | 0,5946      | 0,18049                 |

| Patient ID | FC CDH1 | 2-ΔCT CDH1 | FC EZH2 | 2-ΔCT EZH2 | FC miR-101 | 2-ΔCT miR-101 | FC miR-26b | 2-ΔCT miR-26b | FC miR-200c | 2-ΔCT miR-200c |
|------------|---------|------------|---------|------------|------------|---------------|------------|---------------|-------------|----------------|
| 20/17N     |         | 0,01075    |         | 0,00049    |            | 0,00452       |            | 0,15389       |             | 0,18557        |
| 20/17K     | 0,8351  | 0,00897    | 7,5162  | 0,00367    | 0,8293     | 0,00375       | 0,5548     | 0,08538       | 1,0425      | 0,19345        |
| 20/08N     |         | 1,08673    |         | 0,02856    |            | 0,00923       |            | 0,54337       |             | 0,73713        |
| 20/08K     | 0,8351  | 0,90752    | 1,9453  | 0,05555    | 1,0867     | 0,01003       | 0,1528     | 0,08304       | 0,1321      | 0,09740        |
| 12/16N     |         | 0,01807    |         | 0,00087    |            | 0,00534       |            | 0,12941       |             | 0,12763        |
| 12/16K     | 0,8827  | 0,01595    | 1,6702  | 0,00146    | 0,2073     | 0,00111       | 0,1768     | 0,02288       | 0,3345      | 0,04269        |
| 04/15N     |         | 0,02019    |         | 0,00016    |            | 0,00622       |            | 0,13397       |             | 0,17434        |
| 04/15K     | 0,9862  | 0,01992    | 13,5479 | 0,00217    | 0,1856     | 0,00115       | 0,1908     | 0,02556       | 0,3560      | 0,06207        |
| 12/09N     |         | 0,02816    |         | 0,00085    |            | 0,00491       |            | 0,30779       |             | 0,31208        |
| 12/09K     | 1,0140  | 0,02856    | 4,5002  | 0,00383    | 0,7474     | 0,00367       | 0,7684     | 0,23651       | 0,5035      | 0,15713        |
| 10/09N     |         | 0,13397    |         | 0,04039    |            | 0,02134       |            | 1,21419       |             | 1,00000        |
| 10/09K     | 1,2658  | 0,16958    | 0,0878  | 0,00354    | 0,3536     | 0,00755       | 0,5864     | 0,71203       | 0,7631      | 0,76313        |
| 08/15N     |         | 0,00760    |         | 0,00049    |            | 0,00333       |            | 0,03742       |             | 0,06426        |
| 08/15K     | 1,7411  | 0,01323    | 23,1029 | 0,01128    | 0,5586     | 0,00186       | 0,6690     | 0,02503       | 0,5510      | 0,03540        |
| 01/14N     |         | 0,01992    |         | 0,00044    |            | 0,01686       |            | 0,17678       |             | 0,22688        |
| 01/14K     | 1,7901  | 0,03565    | 2,6390  | 0,00116    | 0,1416     | 0,00239       | 0,1743     | 0,03082       | 0,5586      | 0,12674        |
| 13/16N     |         | 0,01060    |         | 0,00076    |            | 0,00260       |            | 0,04870       |             | 0,08362        |
| 13/16K     | 1,8277  | 0,01937    | 4,8232  | 0,00364    | 0,9202     | 0,00239       | 1,0497     | 0,05112       | 1,0210      | 0,08538        |
| 17/17N     |         | 0,00923    |         | 0,00032    |            | 0,01067       |            | 0,18816       |             | 0,17314        |
| 17/17K     | 1,8921  | 0,01746    | 0,5548  | 0,00018    | 0,4965     | 0,00530       | 0,8011     | 0,15073       | 0,3487      | 0,06037        |
| 08/07N     |         | 0,15713    |         | 0,00588    |            | 0,01833       |            | 0,31208       |             | 0,29525        |
| 08/07T     | 2,0849  | 0,32760    | 2,9079  | 0,01710    | 1,0000     | 0,01833       | 0,4965     | 0,15496       | 0,1830      | 0,05403        |
| 06/15N     |         | 0,01003    |         | 0,00345    |            | 0,00197       |            | 0,03125       |             | 0,10882        |
| 06/15K     | 2,3134  | 0,02320    | 0,2698  | 0,00093    | 2,4623     | 0,00484       | 3,5801     | 0,11188       | 1,4439      | 0,15713        |
| 11/16N     |         | 0,04239    |         | 0,01488    |            | 0,00458       |            | 0,08362       |             | 0,12500        |
| 11/16K     | 3,7321  | 0,15822    | 3,6808  | 0,05479    | 0,3950     | 0,00181       | 0,4444     | 0,03716       | 0,2483      | 0,03103        |
| 16/17N     |         | 0,01458    |         | 0,00042    |            | 0,01698       |            | 0,21169       |             | 0,27168        |
| 16/17K     | 5,6962  | 0,08304    | 21,1121 | 0,00879    | 0,4698     | 0,00798       | 0,2045     | 0,04328       | 1,1647      | 0,31644        |
| 14/16N     |         | 0,01698    |         | 0,00054    |            | 0,00861       |            | 0,20027       |             | 0,24486        |
| 14/16K     | 6,5887  | 0,11188    | 11,2356 | 0,00605    | 0,4033     | 0,00347       | 0,2535     | 0,05077       | 0,1358      | 0,03326        |
| 10/12N     |         | 0,05555    |         | 0,00125    |            | 0,00396       |            | 0,13870       |             | 0,07911        |
| 10/12K     | 14,0257 | 0,77916    | 13,5479 | 0,01698    | 1,6245     | 0,00643       | 2,1435     | 0,29730       | 4,5315      | 0,35849        |

## References:

1. Chou, C.H.; Chang, N.W.; Shrestha, S.; Hsu, S.D.; Lin, Y.L.; Lee, W.H.; Yang, C.D.; Hong, H.C.; Wei, T.Y.; Tu, S.-J.; et al. miRTarBase 2016: updates to the experimentally validated miRNA-target interactions database. *Nucleic Acids Res.* **2016**, *44*, D239–D247.
2. Lewis, B.P.; Burge, C.B.; Bartel, D.P. Conserved Seed Pairing, Often Flanked by Adenosines, Indicates that Thousands of Human Genes are MicroRNA Targets. *Cell* **2005**, *120*, 15–20.
3. Friedman, R.C.; Farh, K.K.H.; Burge, C.B.; Bartel, D.P. Most mammalian mRNAs are conserved targets of microRNAs. *Genome Res.* **2008**, *19*, 92–105.
4. Agarwal, V.; Bell, G.W.; Nam, J.W.; Bartel, D.P. Predicting effective microRNA target sites in mammalian mRNAs. *Elife* **2015**, *4*.
5. Wong, N.; Wang, X. miRDB: an online resource for microRNA target prediction and functional annotations. *Nucleic Acids Res.* **2015**, *43*, D146–D152.
6. Wang, X. Improving microRNA target prediction by modeling with unambiguously identified microRNA-target pairs from CLIP-ligation studies. *Bioinformatics* **2016**, *32*, 1316–1322.
